# Supplementary material for: Systemic infection facilitates transmission of Pseudomonas aeruginosa in mice
Source: PubMed Central journal article supplement (PMC6987207; doi:10.1038/s41467-020-14363-4), 2020-01-28
Supplement: 41467_2020_14363_MOESM1_ESM.pdf [file 41467_2020_14363_MOESM1_ESM.pdf]

Systemic infection facilitates transmission of *Pseudomonas aeruginosa* in mice

Bachta, et al.

**Supplementary Table 1. *P. aeruginosa* Strain Summary**

| Strain  | ST Type | Source      | Geography | NCBI Accession Number | exoU/S | MICs ( $\mu\text{g/mL}$ ) |     |     |       |       |      |     |    |
|---------|---------|-------------|-----------|-----------------------|--------|---------------------------|-----|-----|-------|-------|------|-----|----|
|         |         |             |           |                       |        | Pip/Tazo                  | Cep | Ctz | Mero  | Cipro | Gent | Col | Az |
| PABL002 | 253     | Bloodstream | Chicago   | GCA_003412285.1       | U      | 2/4                       | 1   | 2   | <0.25 | <0.25 | 1    | 1   | 4  |
| PABL012 | Unk.    | Bloodstream | Chicago   | CP031659.1            | S      | 4/4                       | 2   | 2   | 0.5   | <0.25 | 1    | 1   | 4  |
| PABL016 | 2555    | Bloodstream | Chicago   | GCA_003412165.1       | U      | 4/4                       | 2   | 1   | <0.25 | <0.25 | 2    | 4   | 4  |
| PABL017 | 2167    | Bloodstream | Chicago   | CP031660.1            | S      | 4/4                       | 2   | 2   | 0.5   | <0.25 | 2    | 1   | 4  |
| PABL028 | Unk.    | Bloodstream | Chicago   | GCA_003411845.1       | S      | 4/4                       | 2   | 2   | <0.25 | <0.25 | 4    | 1   | 4  |
| PABL030 | Unk.    | Bloodstream | Chicago   | GCA_003412115.1       | S      | 4/4                       | 1   | 1   | 0.5   | <0.25 | 2    | 1   | 8  |
| PABL041 | 253     | Bloodstream | Chicago   | GCA_003411465.1       | U      | 4/4                       | 1   | 1   | 1     | <0.25 | 1    | 1   | 4  |
| PABL046 | Unk.    | Bloodstream | Chicago   | GCA_003411535.1       | S      | 16/4                      | 8   | 2   | 8     | 128   | 8    | 1   | 16 |
| PABL049 | 244     | Bloodstream | Chicago   | GCA_003411745.1       | S      | 8/4                       | 4   | 2   | 4     | <0.25 | 1    | 2   | 16 |
| PABL095 | 348     | Bloodstream | Chicago   | GCA_003410805.1       | S      | 8/4                       | 4   | 2   | 4     | 4     | 1    | 2   | 8  |
| PABL107 | 377     | Bloodstream | Chicago   | GCA_003410475.1       | U      | 8/4                       | 4   | 2   | 4     | <0.25 | 1    | 2   | 4  |
| PAC6    | 1021    | Bloodstream | Taiwan    |                       | U      | 8/4                       | 1   | 2   | 1     | <0.25 | 1    | 1   | 8  |
| S10     | 244     | Bloodstream | Taiwan    |                       | S      | 8/4                       | 1   | 1   | 1     | <0.25 | 1    | 1   | 8  |
| PA01    | 549     | Wound       | Australia | NC_002516.2           | S      | 4/4                       | 2   | 2   | 2     | <0.25 | 2    | 2   | 8  |
| PA14    | 253     | Wound       | Unk.      | NC_008463.1           | U      | 4/4                       | 2   | 2   | 2     | <0.25 | 1    | 1   | 8  |

U = exoenzyme U, S = exoenzyme S; Unk. = unknown

Pip/Tazo = piperacillin-tazobactam, Cep = cefepime, Ctz = ceftazidime, Mero = meropenem, Cipro = ciprofloxacin,

Gent = gentamicin, Col = Colistin, Az = aztreonam

Resistant, Intermediate: Clinical Laboratory Standards Institute, MIC Interpretive Standards ( $\mu\text{g/mL}$ ), 2018

## Supplementary Table 2. Bacterial strain list

| Species              | Strain ID                                   | Relevant Characteristics                                                                                                                                          | Reference       |
|----------------------|---------------------------------------------|-------------------------------------------------------------------------------------------------------------------------------------------------------------------|-----------------|
| <i>E. coli</i>       | TOP-10                                      | F- mcrA $\Delta$ (mrr-hsdRMS-mcrBC) $\phi$ 80lacZ $\Delta$ M15 $\Delta$ lacX74 nupG recA1 araD139 $\Delta$ (ara-leu)7697 galE15 galK rpsL(StrR) endA1 $\lambda$ - | Invitrogen      |
| <i>E. coli</i>       | S17-1 $\lambda$ pir                         | Sm <sup>R</sup> ; <i>pro</i> , <i>thi</i> , <i>hsdR</i> :M <sup>+</sup> , RP4-2-Tc:Mu;Km:Tn7 $\lambda$ pir                                                        | Simon (1983)    |
| <i>E. coli</i>       | SM10 $\lambda$ pir                          | Km <sup>R</sup> ; <i>thi</i> -1 <i>thr</i> , <i>leu</i> , <i>tonA</i> , <i>lacY</i> , <i>supE</i> , <i>recA</i> ::RP4-2-Tc::Mu $\lambda$ pir                      | Simon (1983)    |
| <i>P. aeruginosa</i> | PABL002                                     | human bacteremia isolate (presumed source: intraabdominal abscess)                                                                                                | Scheetz (2009)  |
| <i>P. aeruginosa</i> | PABL002 <sub>lux</sub>                      | As above, luciferase cassette cloned into <i>attB</i> site                                                                                                        | This study      |
| <i>P. aeruginosa</i> | PABL012                                     | human bacteremia isolate (presumed source: uti)                                                                                                                   | Scheetz (2009)  |
| <i>P. aeruginosa</i> | PABL012 <sub>lux</sub>                      | As above, luciferase cassette cloned into <i>attB</i> site                                                                                                        | This study      |
| <i>P. aeruginosa</i> | PABL012 <sub>GIM</sub>                      | As above, with gentamicin cassette cloned into <i>attB</i> site                                                                                                   | This study      |
| <i>P. aeruginosa</i> | PABL012 <sub>lacZ</sub>                     | As above, with <i>lacZ</i> cloned into <i>attB</i> site                                                                                                           | This study      |
| <i>P. aeruginosa</i> | PABL012 $\Delta$ <i>pscJ</i>                | Clean deletion of <i>pscJ</i> ( $\Delta$ 5-245) rendering strain T3S deficient                                                                                    | This study      |
| <i>P. aeruginosa</i> | PABL012 $\Delta$ <i>pscJ</i> <sub>lux</sub> | As above, with luciferase cassette cloned into <i>attB</i> site                                                                                                   | This study      |
| <i>P. aeruginosa</i> | PABL016                                     | human bacteremia isolate (presumed source: Indwelling catheter)                                                                                                   | Scheetz (2009)  |
| <i>P. aeruginosa</i> | PABL016 <sub>lux</sub>                      | As above, luciferase cassette cloned into <i>attB</i> site                                                                                                        | This study      |
| <i>P. aeruginosa</i> | PABL017                                     | human bacteremia isolate (presumed source: pneumonia)                                                                                                             | Scheetz (2009)  |
| <i>P. aeruginosa</i> | PABL017 <sub>lux</sub>                      | As above, luciferase cassette cloned into <i>attB</i> site                                                                                                        | This study      |
| <i>P. aeruginosa</i> | PABL028                                     | human bacteremia isolate (presumed source: pneumonia)                                                                                                             | Scheetz (2009)  |
| <i>P. aeruginosa</i> | PABL028 <sub>lux</sub>                      | As above, luciferase cassette cloned into <i>attB</i> site                                                                                                        | This study      |
| <i>P. aeruginosa</i> | PABL030                                     | human bacteremia isolate (presumed source: unknown)                                                                                                               | Scheetz (2009)  |
| <i>P. aeruginosa</i> | PABL030 <sub>lux</sub>                      | As above, luciferase cassette cloned into <i>attB</i> site                                                                                                        | This study      |
| <i>P. aeruginosa</i> | PABL041                                     | human bacteremia isolate (presumed source: unknown)                                                                                                               | Scheetz (2009)  |
| <i>P. aeruginosa</i> | PABL041 <sub>lux</sub>                      | As above, luciferase cassette cloned into <i>attB</i> site                                                                                                        | This study      |
| <i>P. aeruginosa</i> | PABL046                                     | human bacteremia isolate (presumed source: unknown)                                                                                                               | Scheetz (2009)  |
| <i>P. aeruginosa</i> | PABL046 <sub>lux</sub>                      | As above, luciferase cassette cloned into <i>attB</i> site                                                                                                        | This study      |
| <i>P. aeruginosa</i> | PABL049                                     | human bacteremia isolate (presumed source: biliary stent)                                                                                                         | Scheetz (2009)  |
| <i>P. aeruginosa</i> | PABL049 <sub>lux</sub>                      | As above, luciferase cassette cloned into <i>attB</i> site                                                                                                        | This study      |
| <i>P. aeruginosa</i> | PABL095                                     | human bacteremia isolate (presumed source: pneumonia)                                                                                                             | Scheetz (2009)  |
| <i>P. aeruginosa</i> | PABL095 <sub>lux</sub>                      | As above, luciferase cassette cloned into <i>attB</i> site                                                                                                        | This study      |
| <i>P. aeruginosa</i> | PABL107                                     | human bacteremia isolate (presumed source: unknown)                                                                                                               | Scheetz (2009)  |
| <i>P. aeruginosa</i> | PABL107 <sub>lux</sub>                      | As above, luciferase cassette cloned into <i>attB</i> site                                                                                                        | This study      |
| <i>P. aeruginosa</i> | PAC6                                        | human bacteremia isolate (Shanghai Fever)                                                                                                                         | Chuang (2014)   |
| <i>P. aeruginosa</i> | PAC6 <sub>lux</sub>                         | As above, luciferase cassette cloned into <i>attB</i> site                                                                                                        | This study      |
| <i>P. aeruginosa</i> | S10                                         | human bacteremia isolate (Shanghai Fever)                                                                                                                         | Chuang (2014)   |
| <i>P. aeruginosa</i> | S10 <sub>lux</sub>                          | As above, luciferase cassette cloned into <i>attB</i> site                                                                                                        | This study      |
| <i>P. aeruginosa</i> | PAO1                                        | human wound isolate                                                                                                                                               | Halloway (1955) |
| <i>P. aeruginosa</i> | PAO1 <sub>lux</sub>                         | As above, luciferase cassette cloned into <i>attB</i> site                                                                                                        | This study      |
| <i>P. aeruginosa</i> | PA14                                        | human wound isolate                                                                                                                                               | Rahme (1995)    |
| <i>P. aeruginosa</i> | PA14 <sub>lux</sub>                         | As above, luciferase cassette cloned into <i>attB</i> site                                                                                                        | This Study      |

### Supplementary Table 3. Plasmid list

| Plasmid                        | Relevant Characteristics                                                                                                                                           | Reference       |
|--------------------------------|--------------------------------------------------------------------------------------------------------------------------------------------------------------------|-----------------|
| pEXG2                          | Gm <sup>R</sup> ; allelic exchange vector with pBR origin, <i>sacB</i> <sup>+</sup>                                                                                | Rietsch (2005)  |
| pEXG2 $\Delta$ <i>pscJ</i>     | Gm <sup>R</sup> ; allelic exchange vector for making unmarked deletion of <i>pscJ</i> ( $\Delta$ 5-245); strains are null for T3 secretion                         | This study      |
| pFLP2                          | Ap <sup>R</sup> /Cb <sup>R</sup> ; <i>oriT</i> <sup>+</sup> <i>sacB</i> <sup>+</sup> , Flp recombinase                                                             | Hoang (1998)    |
| pEX18.Gm                       | Gm <sup>R</sup> ; <i>oriT</i> <sup>+</sup> <i>sacB</i> <sup>+</sup> , gene replacement vector with MCS from pUC18                                                  | Hoang (1998)    |
| pminiCTX-1                     | Tc <sup>R</sup> ; self-proficient integration vector with $\Omega$ - <i>FRT-attP</i> -MCS, <i>ori</i> , <i>int</i> , and <i>oriT</i>                               | Hoang (2000)    |
| pminiCTX $\eta$ <i>prt2lux</i> | Tc <sup>R</sup> ; luciferase expressing cassette driven by <i>prt2</i> promoter ligated into miniCTX-1                                                             | Diaz (2008)     |
| pminiCTX-1 <sub>GM</sub>       | Tc <sup>R</sup> Gm <sup>R</sup> ; Gentamicin resistance cassette (amplified from pEX18.Gm) driven by native promoter ligated into miniCTX-1                        | This study      |
| pminiCTX-1 <sub>lacZ</sub>     | Tc <sup>R</sup> ; <i>lacZ</i> expressing cassette ligated into miniCTX-1                                                                                           | Gift of S. Lory |
| pminiCTX <sub>STAMP</sub>      | Tc <sup>R</sup> Gm <sup>R</sup> ; barcoded Gentamicin resistance cassette (amplified from pEX18.Gm) driven by native promoter ligated into EcoRI site in miniCTX-1 | This study      |

#### Supplementary Table 4. Primer list

| Primer              | Sequence 5'-3'                                                                                                        |
|---------------------|-----------------------------------------------------------------------------------------------------------------------|
| pscJ – 5-1 HindIII  | GCATAAATGTAAAGCAGCAGCAGCGATCCTGC                                                                                      |
| pscJ - 5-2          | AACTCGAGCCGCAAGCATGCTGAACGTTGCGCTCATTGGGTC                                                                            |
| pscJ - 3 -1         | TTCAGCATGCTTGCGGCTCGAGTTCGGCAACGGGGCTGAGCG                                                                            |
| pscJ - 3 -2 HindIII | CTAGAGTCGACCTGCAGACTGCTCCTGGTAAACCTCG                                                                                 |
| pscJ - 5            | CCATGGCAATCCCTGGCCGGC                                                                                                 |
| pscJ - 3            | CCGGTAGTAGCGATTGCAGCGC                                                                                                |
| Gm-pCTX_F-BamHI-2   | CGGGATCCC GCCGCTCATGAGACAATAACCCCTGA                                                                                  |
| Gm-pCTX_R-EcoRI     | CGGAATCCGAAAAGTATATATGAGTAAACTT                                                                                       |
| P49                 | ACGCTCTCCGATCTTGTAAAACGACGGCCAGT                                                                                      |
| P47                 | AATGATACGGCGACCACCGAGATCTACACTCTTCCCTACACGACGCTCTCCGATCT                                                              |
| P80                 | TATCGATAAGCTTGATATCGGTAACCTTGGTCTGACAATCGATGC                                                                         |
| P110                | TGGATCCCCCGGGCTGCAGGCAGGAAACAGCTATGACNNNNNNNNNNNNNNNNNNNNNNNNNNNNNNNNNNNACTGGCCGTCGTTTTACACGCCGCTCATGAGACAATAACCCCTGA |
| P48                 | CAAGCAGAAGACGGCATAACGAGATCGTGATGTGACTGGAGTTCAGACGTGTGCTCTTCCGATCATTACAGCAGACCTACGATGTCGGGG                            |
| P51                 | CAAGCAGAAGACGGCATAACGAGATACATCGGTGACTGGAGTTCAGACGTGTGCTCTTCCGATCATTACAGCAGACCTACGATGTCGGGG                            |
| P52                 | CAAGCAGAAGACGGCATAACGAGATGCCTAAGTGTACTGGAGTTCAGACGTGTGCTCTTCCGATCATTACAGCAGACCTACGATGTCGGGG                           |
| P53                 | CAAGCAGAAGACGGCATAACGAGATTGGTCAGTGTACTGGAGTTCAGACGTGTGCTCTTCCGATCATTACAGCAGACCTACGATGTCGGGG                           |
| P54                 | CAAGCAGAAGACGGCATAACGAGATCACTGTGTACTGGAGTTCAGACGTGTGCTCTTCCGATCATTACAGCAGACCTACGATGTCGGGG                             |
| P55                 | CAAGCAGAAGACGGCATAACGAGATAATGGCGTGTACTGGAGTTCAGACGTGTGCTCTTCCGATCATTACAGCAGACCTACGATGTCGGGG                           |
| P56                 | CAAGCAGAAGACGGCATAACGAGATGATCTGGTGTACTGGAGTTCAGACGTGTGCTCTTCCGATCATTACAGCAGACCTACGATGTCGGGG                           |
| P57                 | CAAGCAGAAGACGGCATAACGAGATCAAGTGTACTGGAGTTCAGACGTGTGCTCTTCCGATCATTACAGCAGACCTACGATGTCGGGG                              |
| P58                 | CAAGCAGAAGACGGCATAACGAGATCTGATCGTGTACTGGAGTTCAGACGTGTGCTCTTCCGATCATTACAGCAGACCTACGATGTCGGGG                           |
| P59                 | CAAGCAGAAGACGGCATAACGAGATAAGCTAGTGTACTGGAGTTCAGACGTGTGCTCTTCCGATCATTACAGCAGACCTACGATGTCGGGG                           |
| P60                 | CAAGCAGAAGACGGCATAACGAGATGTAGCCGTGTACTGGAGTTCAGACGTGTGCTCTTCCGATCATTACAGCAGACCTACGATGTCGGGG                           |
| P61                 | CAAGCAGAAGACGGCATAACGAGATTACAAGGTGTACTGGAGTTCAGACGTGTGCTCTTCCGATCATTACAGCAGACCTACGATGTCGGGG                           |
| P62                 | CAAGCAGAAGACGGCATAACGAGATTGTTGACTGTACTGGAGTTCAGACGTGTGCTCTTCCGATCATTACAGCAGACCTACGATGTCGGGG                           |
| P63                 | CAAGCAGAAGACGGCATAACGAGATACGGAATGTGTACTGGAGTTCAGACGTGTGCTCTTCCGATCATTACAGCAGACCTACGATGTCGGGG                          |
| P64                 | CAAGCAGAAGACGGCATAACGAGATTCTGACATGTGTACTGGAGTTCAGACGTGTGCTCTTCCGATCATTACAGCAGACCTACGATGTCGGGG                         |
| P65                 | CAAGCAGAAGACGGCATAACGAGATCGGGACGGGTGTACTGGAGTTCAGACGTGTGCTCTTCCGATCATTACAGCAGACCTACGATGTCGGGG                         |
| P66                 | CAAGCAGAAGACGGCATAACGAGATGTGCGGACGTGTACTGGAGTTCAGACGTGTGCTCTTCCGATCATTACAGCAGACCTACGATGTCGGGG                         |
| P67                 | CAAGCAGAAGACGGCATAACGAGATCGTTTACGTGTACTGGAGTTCAGACGTGTGCTCTTCCGATCATTACAGCAGACCTACGATGTCGGGG                          |
| P68                 | CAAGCAGAAGACGGCATAACGAGATAAGGCCACGTGTACTGGAGTTCAGACGTGTGCTCTTCCGATCATTACAGCAGACCTACGATGTCGGGG                         |
| P69                 | CAAGCAGAAGACGGCATAACGAGATCCGAAACGTGTACTGGAGTTCAGACGTGTGCTCTTCCGATCATTACAGCAGACCTACGATGTCGGGG                          |
| P70                 | CAAGCAGAAGACGGCATAACGAGATTACGTACGGTGTACTGGAGTTCAGACGTGTGCTCTTCCGATCATTACAGCAGACCTACGATGTCGGGG                         |
| P71                 | CAAGCAGAAGACGGCATAACGAGATATCCACTCGTGTACTGGAGTTCAGACGTGTGCTCTTCCGATCATTACAGCAGACCTACGATGTCGGGG                         |
| P72                 | CAAGCAGAAGACGGCATAACGAGATATCAGTGTGTACTGGAGTTCAGACGTGTGCTCTTCCGATCATTACAGCAGACCTACGATGTCGGGG                           |
| P73                 | CAAGCAGAAGACGGCATAACGAGATAAAGGAATGTGTACTGGAGTTCAGACGTGTGCTCTTCCGATCATTACAGCAGACCTACGATGTCGGGG                         |

## Supplementary Figure 1

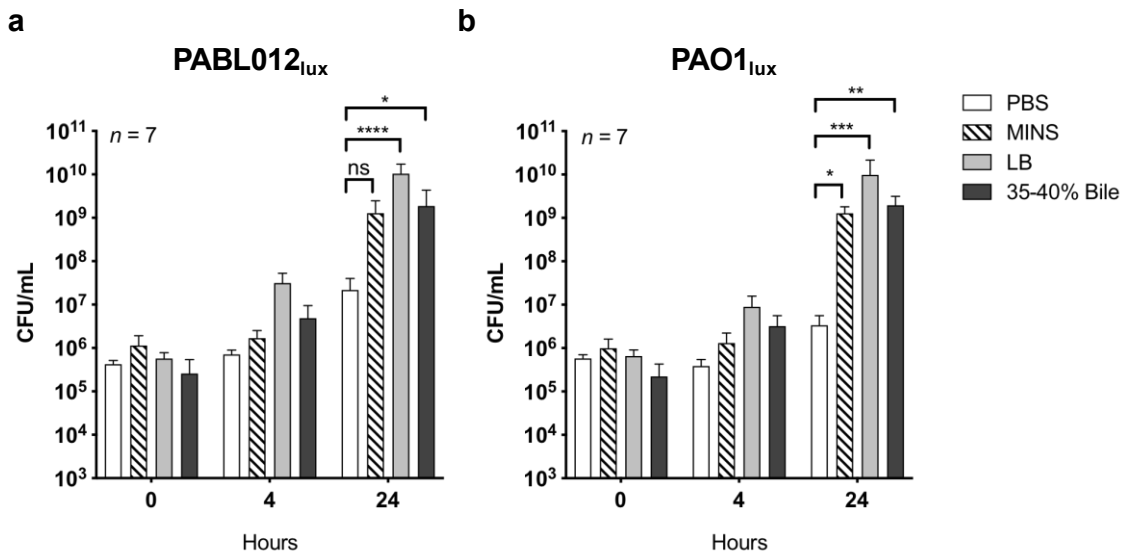

**Bile promotes the replication of *P. aeruginosa*.** In vitro bacterial growth was enumerated for PABL012<sub>lux</sub> (a) and PAO1<sub>lux</sub> (b) in PBS, MINS, LB, or PBS supplemented with 35-40% mouse bile at 0, 4, and 24-hour post-inoculation. Columns represent the mean CFU per mL with standard deviation (SD, whiskers) ( $n = 7$  total, 2 replicates).  $p$ -values were calculated via a Kruskal-Wallis analysis to correct for multiple comparisons. ns (not significant), (\*)  $p < 0.05$ , (\*\*)  $p < 0.005$ , (\*\*\*)  $p < 0.001$ , (\*\*\*\*)  $p < 0.0001$ .

## Supplementary Figure 2

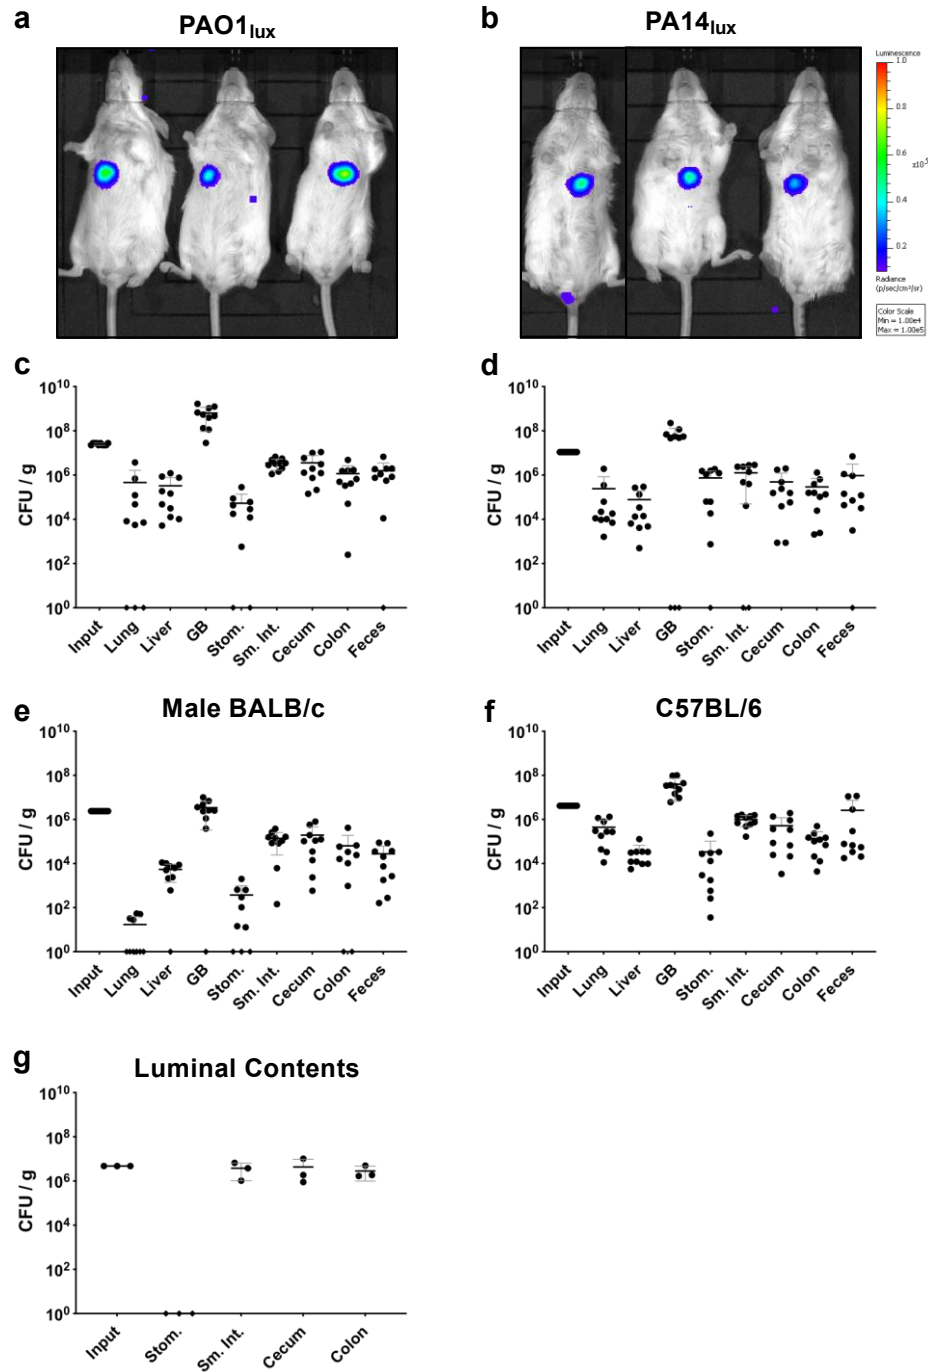

**Gastrointestinal shedding of *P. aeruginosa* is universal and independent of mouse genetics or gender.**

BALB/c mice were infected intravenously with  $\sim 1 \times 10^6$  CFU of PAO1<sub>lux</sub> (**a**  $n = 5 \times 2$  replicates) and  $\sim 2 \times 10^5$  CFU of PA14<sub>lux</sub> (**b**  $n = 6 \times 2$  replicates) and imaged on the IVIS at 24 hpi. Mice were subsequently euthanized, and bacteria were enumerated from several anatomical sites. **c, d** Bacterial density as measured by CFU per gram

organ [CFU/g] are presented (black circles). **e** Age-matched male BALB/c mice ( $n = 5 \times 2$  replicates) were infected intravenously with  $\sim 2 \times 10^6$  CFU of PABL012<sub>lux</sub>, organs harvested as 24 hpi and plated for CFU enumeration. **f** Age-matched C57BL/6 ( $n = 5 \times 2$  replicates) mice were infected intravenously with  $\sim 2 \times 10^6$  CFU of PABL012<sub>lux</sub>, organs harvested as 24 hpi and plated for CFU enumeration. **g** BALB/c mice ( $n = 3$ ) were infected intravenously with  $\sim 2 \times 10^6$  CFU of PABL012<sub>lux</sub>, bacteria were enumerated from the luminal contents of the GI tract by extrusion of contents following dissection. Each symbol represents one mouse; when no bacteria were recovered, mice are represented as diamonds on the  $x$ -axis. Geometric means (horizontal lines) and SD (whiskers) are shown. GB (gallbladder), Stom. (stomach), Sm. Int. (small intestine).



### Supplementary Figure 3

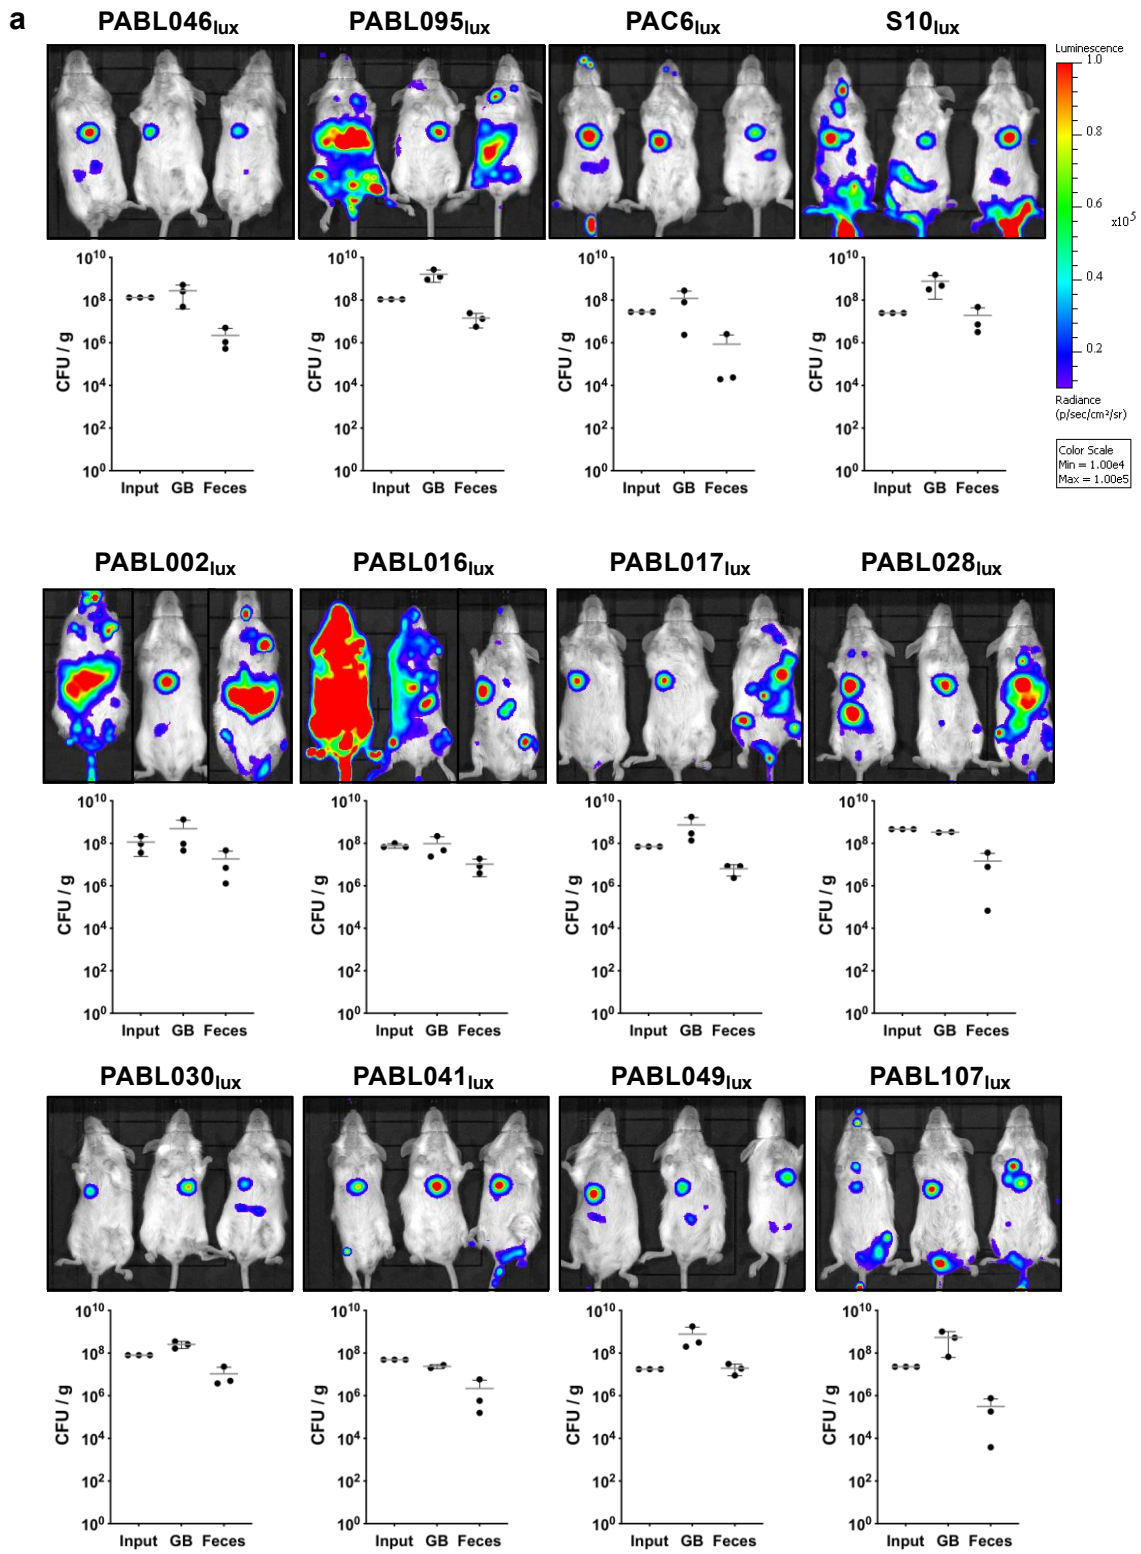

**b**

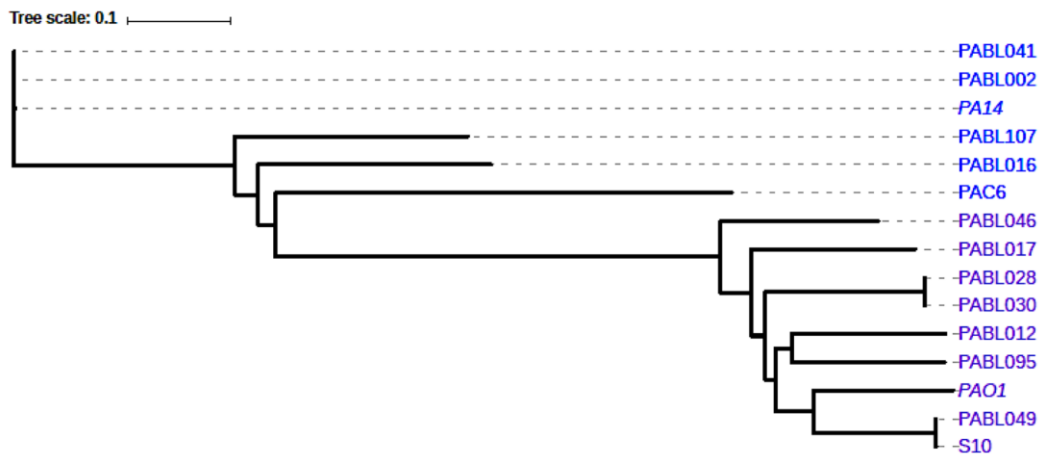

**Dissemination to the gallbladder and fecal excretion are shared features among diverse clinical isolates of *P. aeruginosa*.** **a** BALB/c mice were infected intravenously with  $8.8 \times 10^5$  –  $4.8 \times 10^7$  (dose specific to each strain, representative replicate) of *P. aeruginosa* strains PABL046<sub>lux</sub>, PABL095<sub>lux</sub>, PAC6<sub>lux</sub>, S10<sub>lux</sub>, PABL002<sub>lux</sub>, PABL016<sub>lux</sub>, PABL017<sub>lux</sub>, PABL028<sub>lux</sub>, PABL030<sub>lux</sub>, PABL041<sub>lux</sub>, PABL049<sub>lux</sub>, and PABL107<sub>lux</sub> and imaged at 24 hpi using IVIS. Mice were subsequently euthanized, and bacteria were enumerated from gallbladder and feces. CFU per gram organ (CFU/g, black circles) of recovered bacteria are presented. Each circle represents one mouse ( $n = 3$ , minimum 2 replicates). Geometric means (horizontal lines) and SD (whiskers) are shown. **b** A parsimony tree based on SNP loci present in 95% of the genomes was generated using kSNP v3.0.21 and visualized in iTOL. The midpoint rooted tree was used to visualize *exoU*<sup>+</sup> strains (blue) and *exoS*<sup>+</sup> strains (purple).

## Supplementary Figure 4

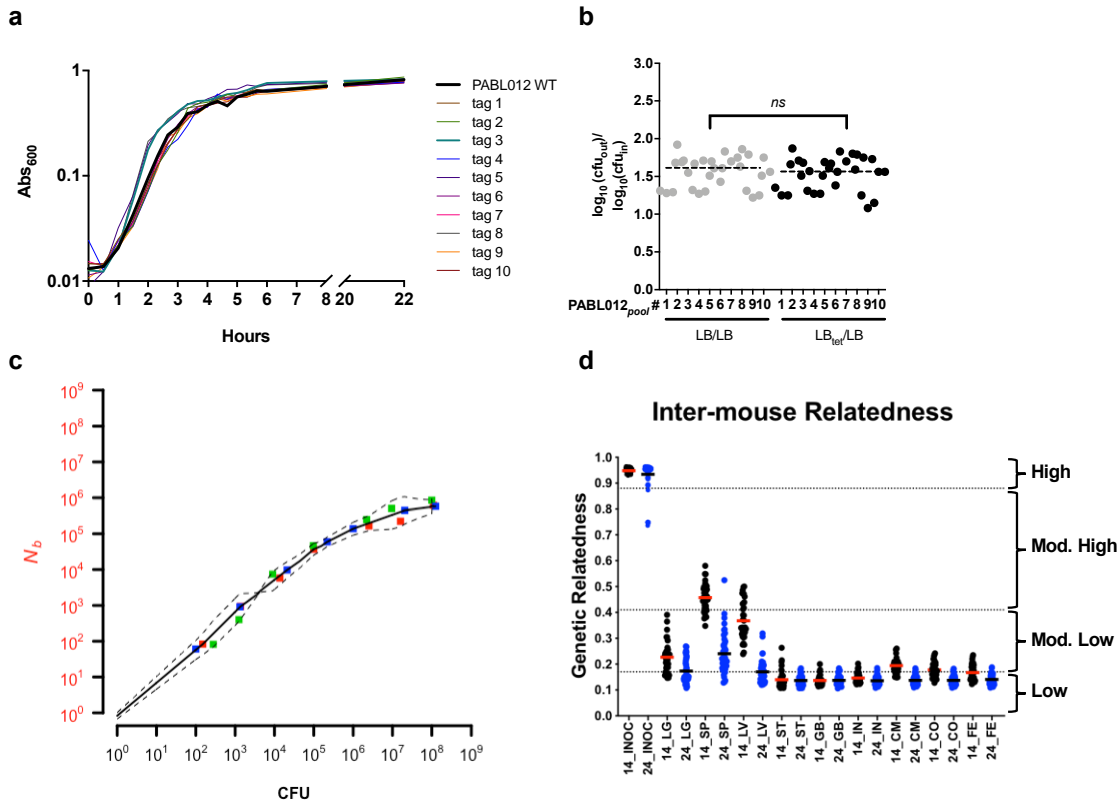

**STAMP control experiments and calculations.** **a** In vitro growth of parental PABL012 and a selection of 10 individually barcoded PABL012<sub>pool</sub> (tag 1-10) strains in liquid culture over 22 hours. **b** The stability of barcode insertion was determined by comparing the output and input CFU for the same 10 individually barcoded strains grown initially in liquid culture without selection for the barcodes (LB) for 20 hours followed by growth on agar plates with tetracycline supplementation for growth of barcoded bacteria (LB<sub>tet</sub>) or without tetracycline supplementation for growth of both tagged and untagged bacteria (LB). The data are presented as a ratio of output to input CFU (grey circle [LB vs. LB], black circle [LB<sub>tet</sub> vs. LB]). The dashed line represents the overall median for each condition where PABL012<sub>pool</sub> strains with tags #1-10 were tested in triplicate (each data point represents one replicate). No significant difference in the ratio of output to input with or without tag selection was detected ( $p = 0.62$ , Mann-Whitney test). **c** Calibration curve for correspondence of mathematically derived founding population sizes ( $N_b$ , y-axis) with experimentally determined founding population sizes (CFU, x-axis) for three independent technical replicates (filled red, blue, green squares). The solid line indicates the median and the dashed black lines represent the 95% confidence intervals (CI). **d** Genetic relatedness (GR) of the

inoculums and bacteria from the same organ type in different mice (inter-mouse) are presented. For the inoculums (INOC), each circle represents the allelic frequency of barcodes in each inoculum compared to the allelic frequencies of the same barcodes in a different inoculum (technical replicates,  $n = 30$ ). For inter-mouse GR, each circle represents one organ in pairwise comparison with the same organ from a different mouse (14 hpi black, 24 hpi blue). Geometric means (14 hpi [red] and 24 hpi [black], horizontal bars) are shown. Dashed lines denote GR categories which are defined as High ( $\geq 0.88$ ), Moderately High (Mod. High,  $< 0.88, \geq 0.41$ ), Moderately Low (Mod. Low,  $< 0.41, \geq 0.17$ ), and Low ( $< 0.17$ ). LG (lung), SP (spleen), LV (liver), ST (stomach), GB (gallbladder), IN (small intestine), CM (cecum), CO (colon), FE (feces).

# Supplementary Figure 5

## STAMP 14 hpi

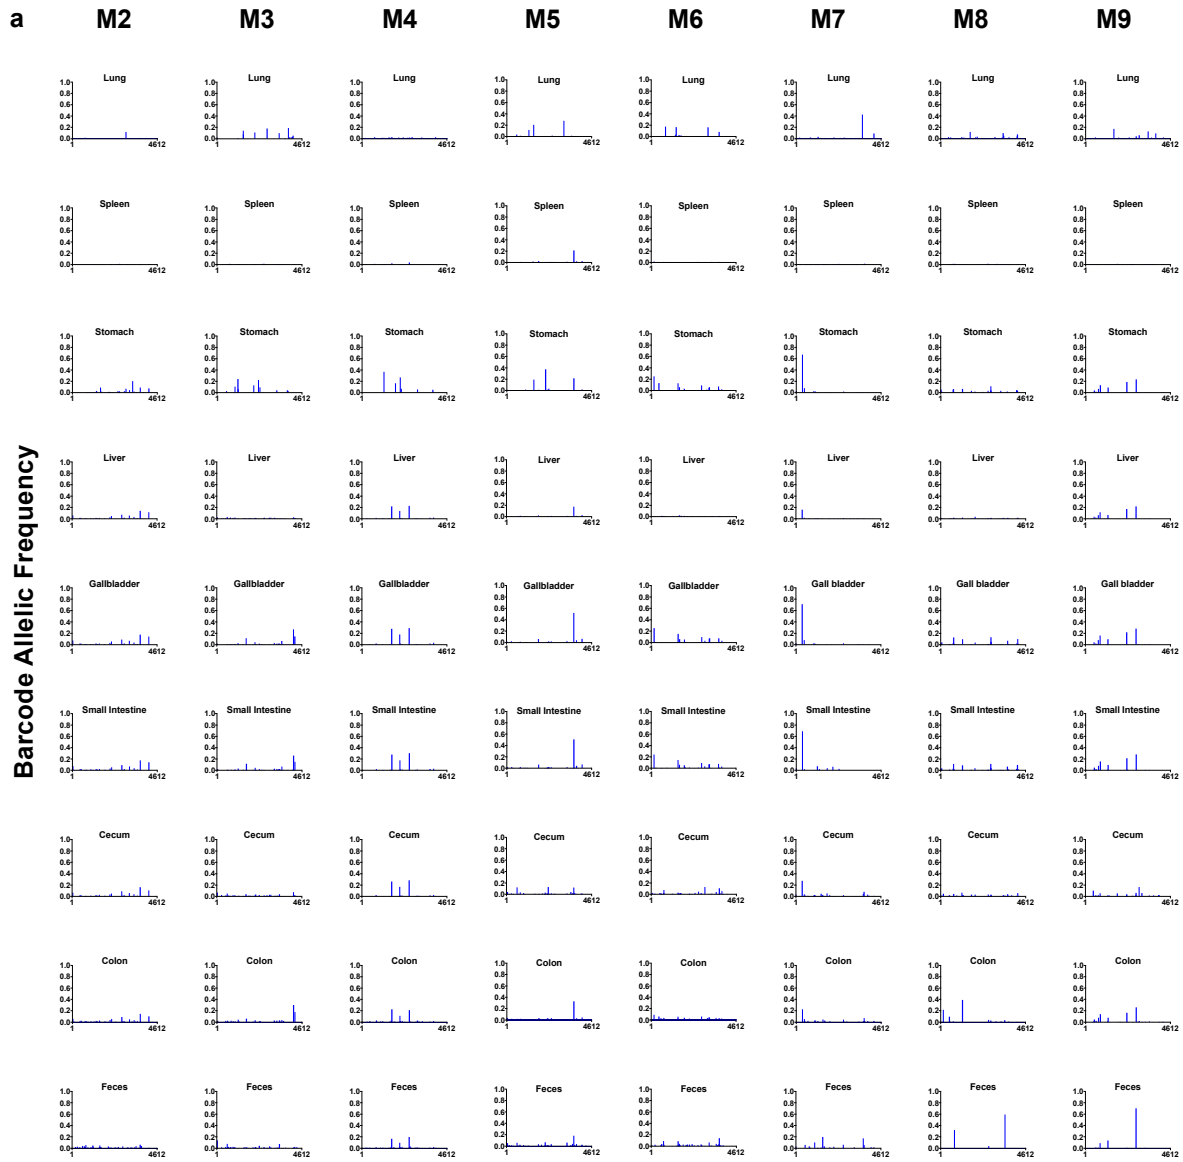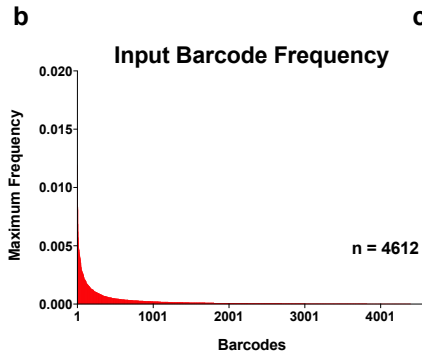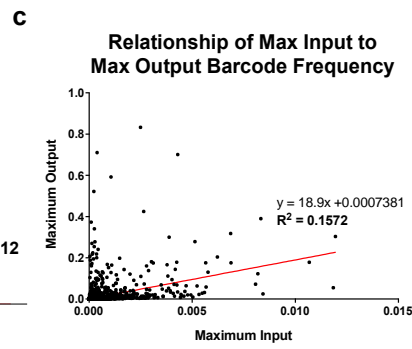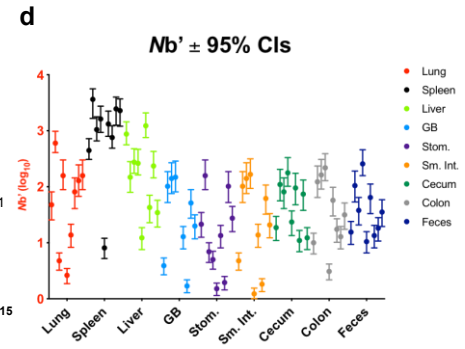

**Individual STAMP barcode distributions across all organs in all mice at 14 hpi.** BALB/c mice (14 hpi, Mouse 2-9) were infected with *P. aeruginosa* strain PABL012<sub>lux</sub> by intravenous inoculation of  $\sim 2 \times 10^6$  CFU and organs harvested. **a** Allelic frequencies of all unique barcodes are presented (*y*-axis) for every organ and every mouse (M2-9, M1 is shown in main text). All 4612 unique barcodes are arranged in identical order along the *x*-axis. **b** For all 4612 barcodes processed, the maximum frequency found in any inoculum (across all 30 technical replicates) is presented along the *y*-axis. Barcodes are arranged from most frequent (0.0119, 1.19%) to least frequent (0.000007, 0.0007%). **c** To determine the relationship between input frequency and output frequency for all 4612 barcodes, we plotted the maximum output frequency of that barcode (*y*-axis) in any mouse versus the maximum input frequency of that barcode found in the inoculum (*x*-axis). A linear regression was performed, revealing a poor correlation between the input barcode and the output barcode frequency ( $R^2 = 0.1572$ ). **d** The calculated  $N_b'$  values and their associated 95% confidence intervals (CI, whiskers) for every organ in every mouse at 14 hpi; circles, lung (red), spleen (black), liver (light green), gallbladder (GB, light blue), stomach (Stom., purple), small Intestine (Sm. Int, orange), cecum (green), colon (grey), feces (navy).

# Supplementary Figure 6

## STAMP 24 hpi

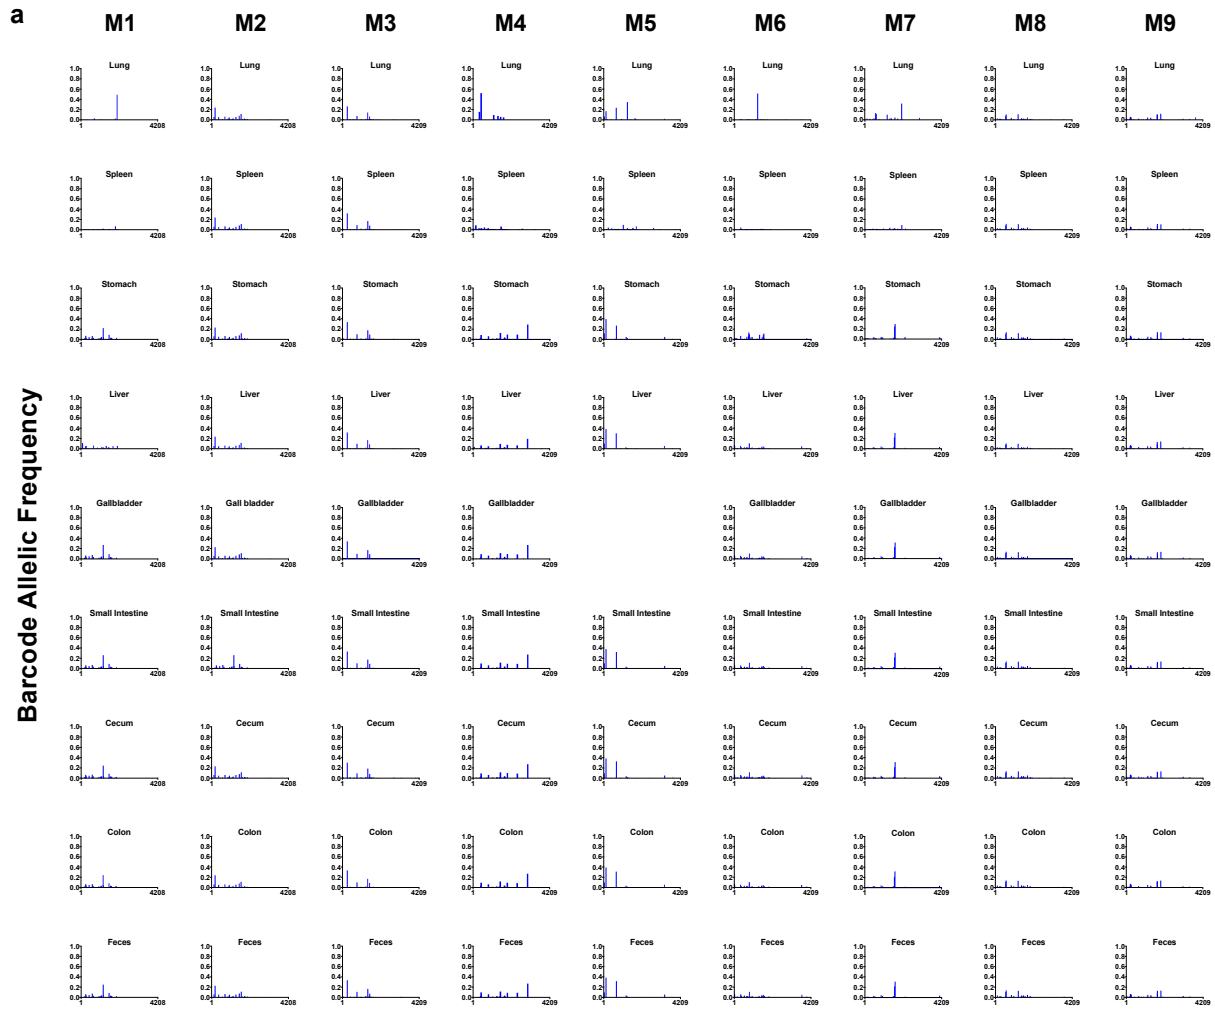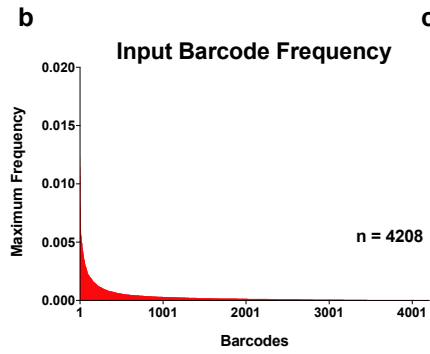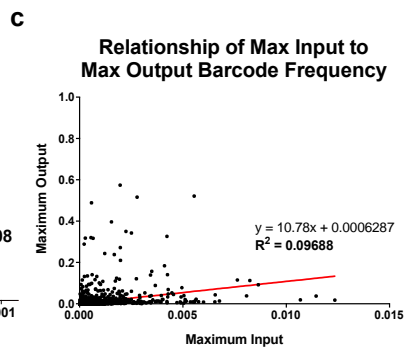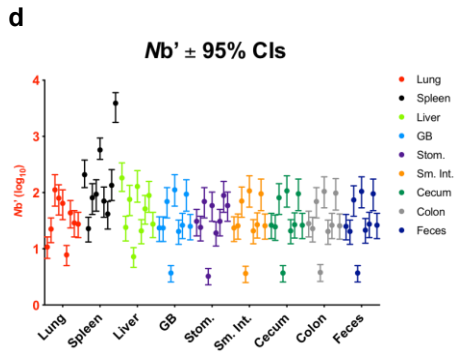

**Individual STAMP barcode distributions across all organs in all mice at 24 hpi.** BALB/c mice (24 hpi, Mouse 1-9) were infected with *P. aeruginosa* strain PABL012<sub>lux</sub> by intravenous inoculation of  $\sim 2 \times 10^6$  CFU and organs harvested. **a** Allelic frequencies of all unique barcodes are presented (y-axis) for every organ and every mouse (M1-9, M10 shown in main text). All 4208 barcodes are arranged in identical order along the x-axis. Mouse 5's gallbladder was unable to be processed following dissection. **b** For all 4208 barcodes processed, the maximum frequency found in any inoculum (across all 30 technical replicates) is presented along the y-axis. Barcodes are arranged from most-frequent (0.0124, 1.24%) to least frequent (0.000011, 0.00011%). **c** In order to determine the relationship between input frequency and output frequency for all 4208 barcodes, we plotted the maximum output frequency of that barcode (y-axis) in any mouse versus the maximum input frequency of that barcode found in the inoculum (x-axis). A linear regression was performed, revealing a poor correlation between the input barcode and the output barcode frequency ( $R^2 = 0.09688$ ). (d) The calculated  $N_b'$  values and their associated 95% confidence intervals (CI, whiskers) for every organ in every mouse at 14 hpi; circles, lung (red), spleen (black), liver (light green), gallbladder (GB, light blue), stomach (Stom., purple), small intestine (Sm. Int, orange), cecum (green), colon (grey), feces (navy).



Supplemental Figure 7

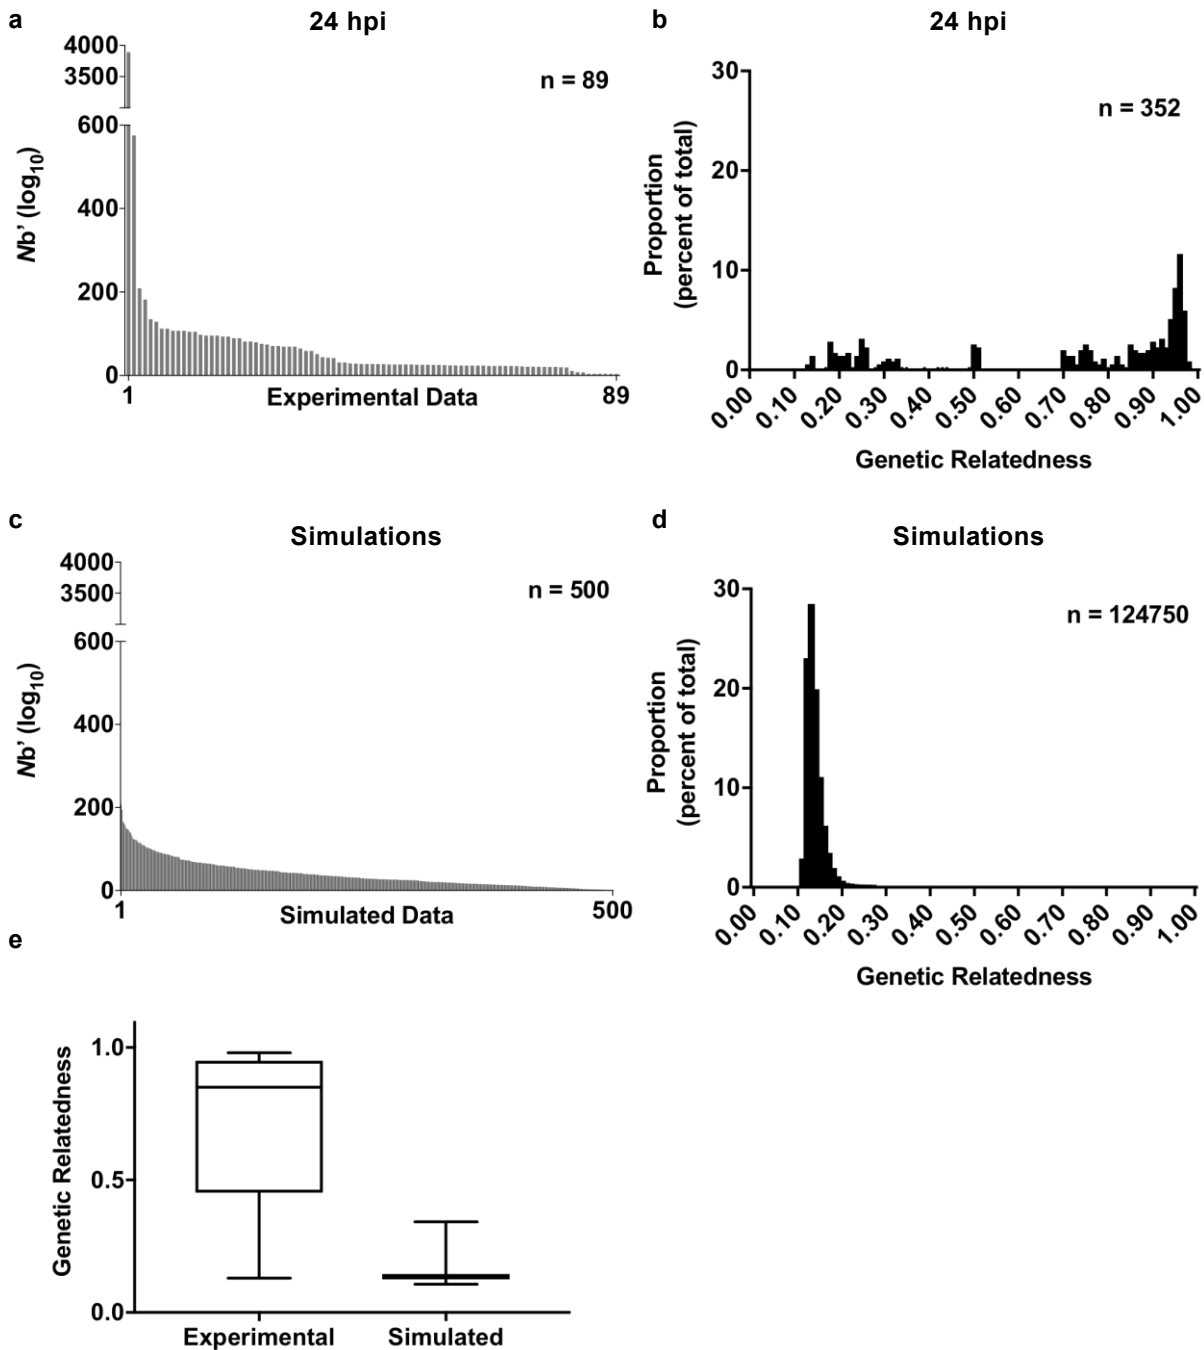

**Comparison of experimentally derived and simulated STAMP bottlenecks and genetic relatedness.**

**a** The experimentally determined  $N_b'$  values (y-axis) of PA populations sampled from all mouse organs (M1-10) at 24 hpi are sorted along the x-axis from highest to lowest  $N_b'$  value ( $n = 89$ , max = 3890, min = 3). (b) The genetic relatedness (GR) of these sampled PA populations within each mouse was calculated in a pairwise manner as described in the text (min = 0.13, max 0.98). GR values were rounded to the nearest hundredth,

grouped in 0.01 increments and plotted as a histogram. The y-axis represents the proportion of comparisons producing that GR value ( $n = 352$  total comparisons). **c** Using the experimentally determined inoculum barcode distribution and the average frequency distribution of barcodes in the tightest organ bottleneck (Gallbladder at 24hpi), we randomly simulated 500 independent bottleneck events. We calculated  $N_b'$  values for all 500 simulated bottleneck events and sorted them along the x-axis highest to lowest  $N_b'$  value (max = 209, min = 1). **d** The GR between each of the simulated populations from panel **c** was calculated in a pairwise manner (min = 0.11, max 0.34). GR values were rounded to the nearest hundredth, grouped in 0.01 increments and plotted as a histogram. The y-axis represents the proportion of comparisons producing that GR value ( $n = 124,750$  total comparisons). **e** The experimental (**b**) and simulated (**d**) GR values are displayed as a box plot where the median (black line), interquartile range (box), and minimum and maximum (whiskers) are presented. No outliers are present as the whiskers represent maximum and minimum values.
